# Supplementary material
Source: Springer Nature journal article supplement (https://www.springermedizin.de/resource/supplementary/12985_2009_553_MOESM5_ESM.pdf/9608436)

A

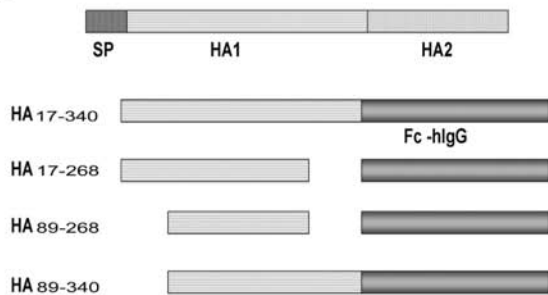

B

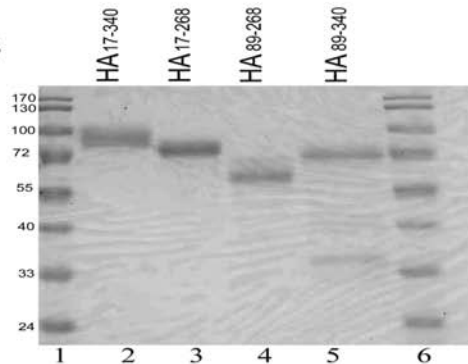

C

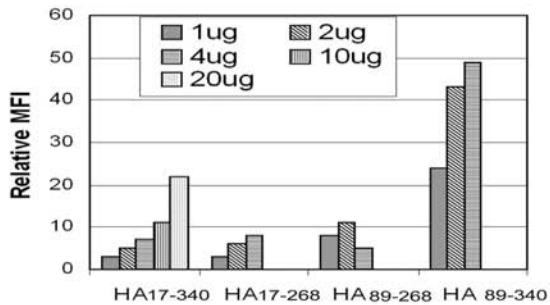

D

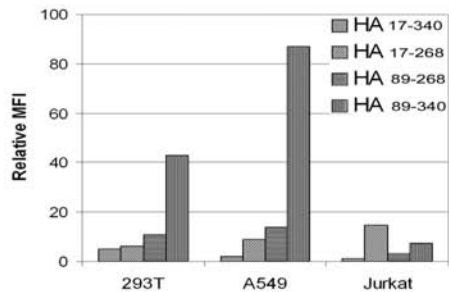

Supplement: MOESM5 [file 9608436]
